# Supplementary material for: An Impedance Aptasensor with Microfluidic Chips for Specific Detection of H5N1 Avian Influenza Virus
Source: Sensors (Basel). 2015 Jul 29;15(8):18565–78. doi: 10.3390/s150818565 (PMC4570336; doi:10.3390/s150818565)
Supplement: Supplementary File 1 [file sensors-15-18565-s001.pdf]

*Supplementary Information***An Impedance Aptasensor with Microfluidic Chips for Specific Detection of H5N1 Avian Influenza Virus. *Sensors* 2015, 15, 18565-18578**

**Jacob Lum**<sup>1</sup>, **Ronghui Wang**<sup>2</sup>, **Billy Hargis**<sup>3</sup>, **Steve Tung**<sup>4</sup>, **Walter Bottje**<sup>3</sup>, **Huaguang Lu**<sup>5</sup> and **Yanbin Li**<sup>2,3,\*</sup>

<sup>1</sup> Cell and Molecular Biology Program, University of Arkansas, Fayetteville, AR 72701, USA; E-Mail: [jlum@pacificvetgroup.com](mailto:jlum@pacificvetgroup.com)

<sup>2</sup> Department of Biological and Agricultural Engineering, University of Arkansas, Fayetteville, AR 72701, USA; E-Mail: [rwang@uark.edu](mailto:rwang@uark.edu)

<sup>3</sup> Department of Poultry Science, University of Arkansas, Fayetteville, AR 72701, USA; E-Mails: [bhargis@uark.edu](mailto:bhargis@uark.edu) (B.H.); [wbottje@uark.edu](mailto:wbottje@uark.edu) (W.B.)

<sup>4</sup> Department of Mechanical Engineering, University of Arkansas, Fayetteville, AR 72701, USA; E-Mail: [chstung@uark.edu](mailto:chstung@uark.edu)

<sup>5</sup> Animal Diagnostic Laboratory, Pennsylvania State University, University Park, PA 16802, USA; E-Mail: [hxl15@psu.edu](mailto:hxl15@psu.edu)

\* Author to whom correspondence should be addressed; E-Mail: [yanbinli@uark.edu](mailto:yanbinli@uark.edu); Tel.: +1-479-575-2881; Fax: +1-479-575-2846.

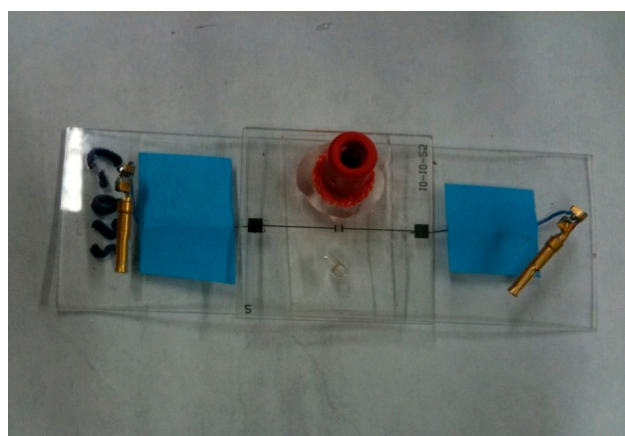

(a)

**Figure S1. Cont.**

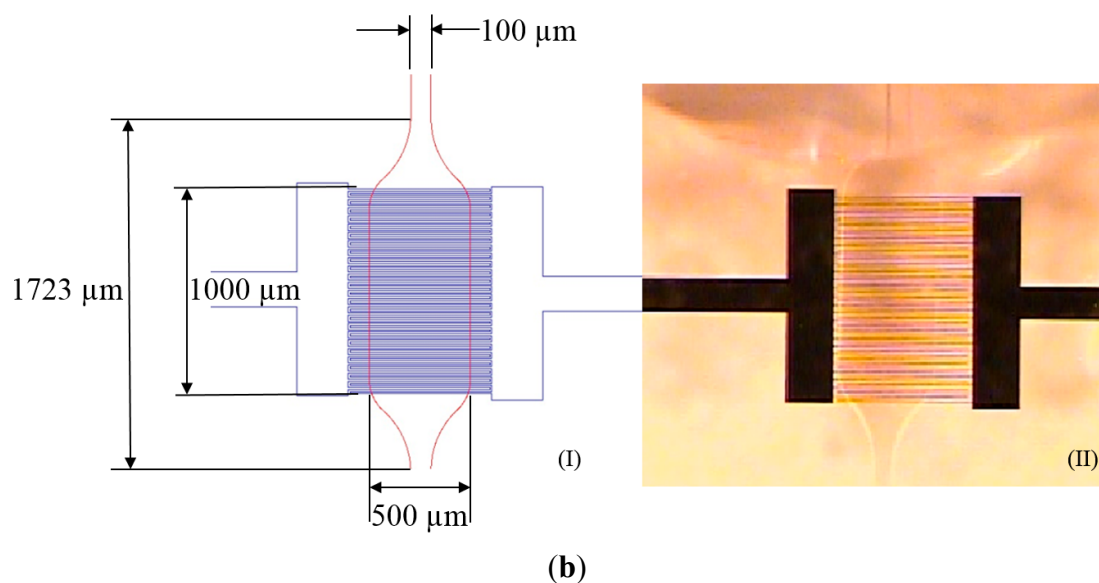

**Figure S1.** (a) Microfluidic chip with inlet port and embedded interdigitated microelectrode; (b) Gold interdigitated array microelectrode (I) drawing and (II) picture. The microfluidic channel is 40  $\mu\text{m}$  deep and 100  $\mu\text{m}$  wide with an oval-shaped microfluidics chamber (40  $\mu\text{m}$  deep, 500  $\mu\text{m}$  wide, and 1723  $\mu\text{m}$  long; 34.5 nl volume). Each electrode consisted of 25 pairs of 10  $\mu\text{m}$  wide electrode fingers spaced 10  $\mu\text{m}$  apart.

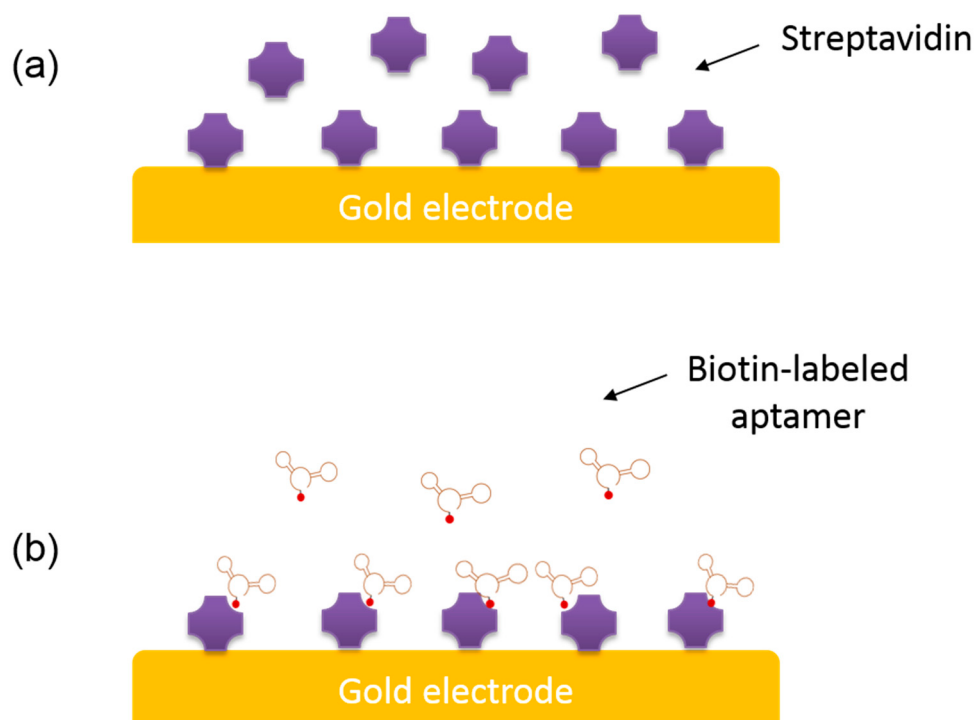

**Figure S2.** *Cont.*

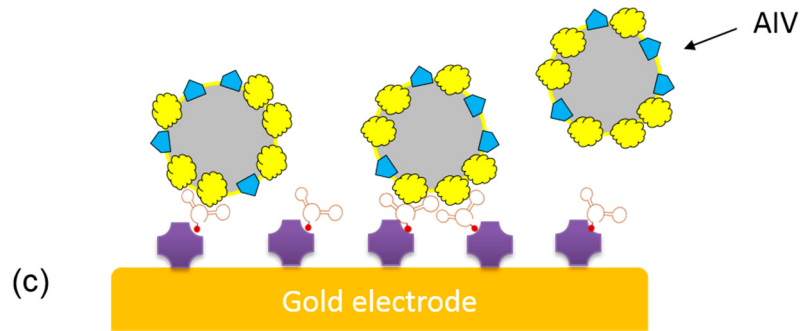

**Figure S2.** Design of the impedance aptasensor for the detection of AIV H5N1. (a) The microelectrode surface was modified using streptavidin; (b) The biotin-labeled aptamer was then immobilized through biotin-streptavidin binding; (c) Target AIV H5N1 was captured and the impedance was measured. After each step the flow cell was washed to remove unbound particles.

**Table S1.** Secondary structures of the H5N1 aptamer predicted by web-based UNAFold software using the OligoAnalyzer 3.1 program from IDT (Integrated DNA Technologies).

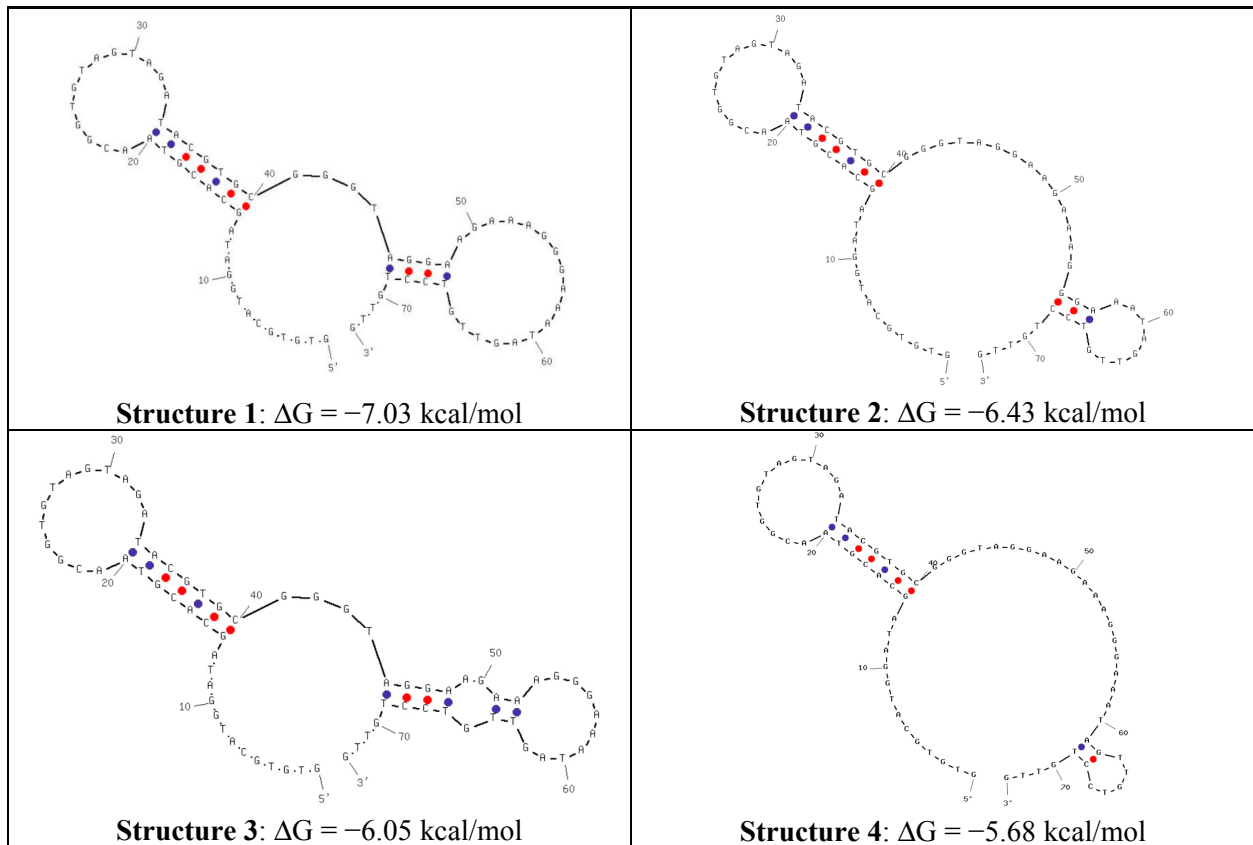

Table S1. Cont.

|                                                                                                                                                     |                                                                                                                                                      |
|-----------------------------------------------------------------------------------------------------------------------------------------------------|------------------------------------------------------------------------------------------------------------------------------------------------------|
| 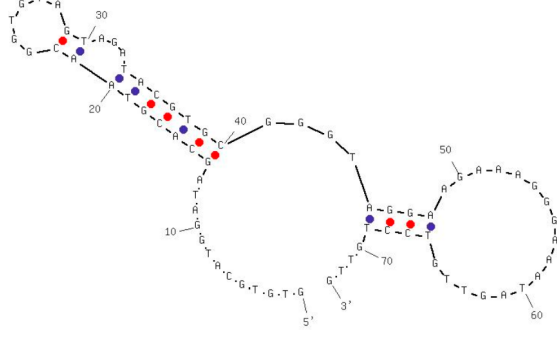 <p><b>Structure 5:</b> <math>\Delta G = -5.45</math> kcal/mol</p> | 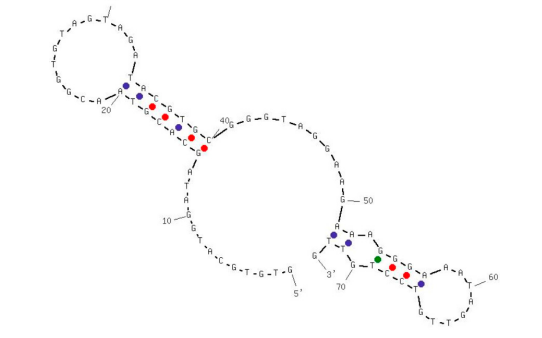 <p><b>Structure 6:</b> <math>\Delta G = -5.26</math> kcal/mol</p> |
| 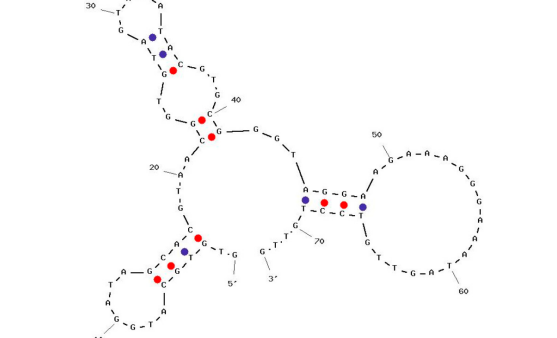 <p><b>Structure 7:</b> <math>\Delta G = -4.69</math> kcal/mol</p> |                                                                                                                                                      |

**Table S2.** A comparison study between the developed aptasensor and other methods for AIV H5 subtype detection based on the same virus unit (HAU).

| Methods                      | Detection Time | Detection Limit | Label-Free Detection | Reference  |
|------------------------------|----------------|-----------------|----------------------|------------|
| SPR aptasensor               | 1.5 h          | 0.128 HAU       | Yes                  | 6          |
| Hydrogel QCM aptasensor      | 0.5 h          | 0.0128 HAU      | Yes                  | 13         |
| QCM aptasensor               | 1 h            | 1 HAU           | Yes                  | 36         |
| QCM immunosensor             | 2 h            | 0.0128 HAU      | No                   | 11         |
| Impedance aptasensor         | 2 h            | 0.0008 HAU      | No                   | 38         |
| Impedance immunosensor       | 1 h            | 0.5 HAU         | Yes                  | 48         |
| Bio-nanogate based biosensor | 1 h            | 0.00195 HAU     | Yes                  | 49         |
| RT-PCR                       | 3 h            | 0.0256 HAU      | Yes                  | 4          |
| Impedance aptasensor         | 0.5 h          | 0.0128 HAU      | Yes                  | This study |
